# Supplementary material
Source: Springer Nature journal article supplement (https://www.springermedizin.de/resource/supplementary/13049_2013_724_MOESM2_ESM.pdf/9667192)

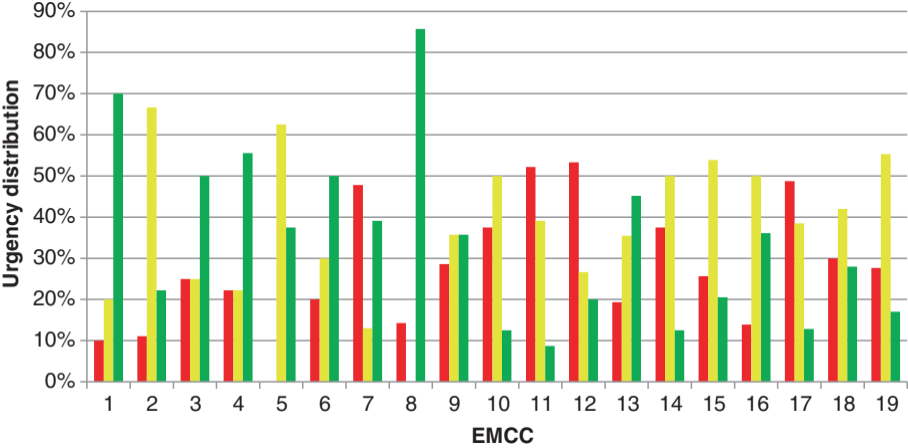

Supplement: MOESM2 [file 9667192]
